# Supplementary material for: Prevalence of depression, anxiety and post-traumatic stress disorder in health care workers during the COVID-19 pandemic: A systematic review and meta-analysis
Source: PubMed Central journal article supplement (PMC7946321; doi:10.1371/journal.pone.0246454), 2021-03-10
Supplement: pone.0246454.s001.pdf [file pone.0246454.s001.pdf]

## S1 Appendix A. Search terms

| Mental health                                                                                                                                                                                                                                        | Health care worker                                                                                                                                                                                                                                                                                                                                           | COVID-19                                                                                              |
|------------------------------------------------------------------------------------------------------------------------------------------------------------------------------------------------------------------------------------------------------|--------------------------------------------------------------------------------------------------------------------------------------------------------------------------------------------------------------------------------------------------------------------------------------------------------------------------------------------------------------|-------------------------------------------------------------------------------------------------------|
| <i>International database (e.g. MEDLINE)</i>                                                                                                                                                                                                         |                                                                                                                                                                                                                                                                                                                                                              |                                                                                                       |
| <p>“mental health”, “psychological”, “mood” (burden, condition, problem, disorder, distress, illness, injury)</p> <p>“resilience”, “wellbeing”</p> <p>“post-traumatic stress disorder”, “adjustment disorder”, “trauma”, “depression”, “anxiety”</p> | <p>“health care”, “hospital”, “medical” (worker, professional, personnel, staff, provider)</p> <p>“doctor”, “physician”, “registrar”, “consultant”, “nurse”, “paramedic”, “midwife”, “surgeon”, “general practitioner”, “frontline worker”, “health care assistant”, “allied health professional”</p> <p>“intensive care”, “critical care”, “outpatient”</p> | <p>“SARS-CoV-2”, “2019-nCoV”, “coronavirus”, “novel coronavirus”, “Wuhan coronavirus”, “COVID-19”</p> |
| <i>Chinese database (e.g. SinoMed)</i>                                                                                                                                                                                                               |                                                                                                                                                                                                                                                                                                                                                              |                                                                                                       |
| <p>“心理健康”、“心理问题”、“心理障碍”、“心理困扰”、“精神紊乱”、“精神问题”、“精神障碍”、“精神健康”、“心理负担”、“精神负担”、“精神疾病”、“心理疾病”、“压力”、“恐惧”、“情绪”、“心理状态”、“创伤后应激障碍”、“PTSD”、“焦虑”、“焦虑症”、“创伤”、“抑郁症”、“抑郁症状”、“抑郁”</p>                                                                                  | <p>“健康从业者”、“医护人员”、“医疗人员”、“医疗工作者”、“医生”、“护士”、“产科”、“重症监护”、“护理人员”、“全科医生”、“门诊”、“急诊”、“医院”</p>                                                                                                                                                                                                                                                                      | <p>“新冠”、“新冠肺炎”、“新冠病毒”、“新冠疫情”、“新型冠状病毒”、“COVID-19”、“2019冠状病毒”、“严重急性呼吸系统综合征冠状病毒2”</p>                    |

## S1 Appendix B. Example search strategy: MEDLINE

|   |                                                                                                                                                                                                                                                                                                                                                                                                                                                                                                                                                                                                                                                                                                                                                                                                                                                                                                                                                                                                                                    |
|---|------------------------------------------------------------------------------------------------------------------------------------------------------------------------------------------------------------------------------------------------------------------------------------------------------------------------------------------------------------------------------------------------------------------------------------------------------------------------------------------------------------------------------------------------------------------------------------------------------------------------------------------------------------------------------------------------------------------------------------------------------------------------------------------------------------------------------------------------------------------------------------------------------------------------------------------------------------------------------------------------------------------------------------|
| 1 | <p>“(Mental health adj3 (burden* or condition* or problem* or distress* or disorder* or illness* or injur*))” OR<br/> “(Psychological adj3 (burden* or condition* or problem* or distress* or disorder* or illness* or injur*))” OR<br/> “(MOOD adj3 (burden* or condition* or problem* or distress* or disorder* or illness* or injur*))” OR<br/> “Depress*” OR “Anxiety” OR “Anxiety disorder*” OR “Affective symptom*” OR “Post?traumatic stress*” OR<br/> “PTSD” OR “Adjustment disorder*” OR “Secondary traumatic stress*” OR “Neuros*” OR “Panic” OR “Fear”<br/> OR “Breakdown” OR “Wellbeing” OR “Resilience”.mp. [mp=title, abstract, original title, name of substance<br/> word, subject heading word, floating sub-heading word, keyword heading word, protocol supplementary<br/> concept word, rare disease supplementary concept word, unique identifier, synonyms]</p>                                                                                                                                              |
| 2 | <p>“(Health care adj (worker* or professional* or personnel or staff or employee* or provider* or physician* or<br/> assistant*))” OR “(Hospital adj (worker* or professional* or personnel or staff or employee* or provider* or<br/> physician* or assistant*))” OR “(Medical adj (worker* or professional* or personnel or staff or employee* or<br/> provider* or physician* or assistant*))” OR “(Nursing adj (staff or personnel))” OR “Doctor*” OR “Registrar*”<br/> OR “Consultant*” OR “Nurse*” OR “Paramedic*” OR “Allied health worker*” OR “Midwi*” OR “Surgeon*” OR<br/> “General practitioner*” OR “Frontline worker*” OR “(Intensive adj (care or care unit or care nursing))” OR<br/> “Emergency department*” OR “Outpatient*” OR “Critical care”.mp. [mp=title, abstract, original title, name of<br/> substance word, subject heading word, floating sub-heading word, keyword heading word, protocol<br/> supplementary concept word, rare disease supplementary concept word, unique identifier, synonyms]</p> |
| 3 | <p>“SARS-CoV-2” OR “2019-nCoV” OR “New coronavirus” OR “Novel coronavirus” OR “Wuhan coronavirus”<br/> OR “COVID-19”.mp. [mp=title, abstract, original title, name of substance word, subject heading word,<br/> floating sub-heading word, keyword heading word, protocol supplementary concept word, rare disease<br/> supplementary concept word, unique identifier, synonyms]</p>                                                                                                                                                                                                                                                                                                                                                                                                                                                                                                                                                                                                                                              |
| 4 | 1 AND 2 AND 3                                                                                                                                                                                                                                                                                                                                                                                                                                                                                                                                                                                                                                                                                                                                                                                                                                                                                                                                                                                                                      |
