# Supplementary material for: Prevalence of depression, anxiety and post-traumatic stress disorder in health care workers during the COVID-19 pandemic: A systematic review and meta-analysis
Source: PubMed Central journal article supplement (PMC7946321; doi:10.1371/journal.pone.0246454), 2021-03-10
Supplement: pone.0246454.s002.pdf [file pone.0246454.s002.pdf]

**S2 Appendix. Selected characteristics of the 65 studies included in this review**

| Study                         | Country          | Publication status | Sampling method | Sample size | Response rate | Age: mean, SD | Gender: female | Occupation                                                                                                                         | Direct contact with patients with COVID-19 |
|-------------------------------|------------------|--------------------|-----------------|-------------|---------------|---------------|----------------|------------------------------------------------------------------------------------------------------------------------------------|--------------------------------------------|
| Amerio et al. (2020)          | Italy            | Peer-reviewed      | Non-random      | 131         | 25%           | 52.3, 12.2    | 63             | General practitioner: 131                                                                                                          | N/A                                        |
| Apisarnthanarak et al. (2020) | Thailand         | Peer-reviewed      | Non-random      | 160         | N/A           | 32            | 95             | Physician: 52<br>Nurse: 45<br>Assistant nurse: 16<br>Other: 47                                                                     | 82                                         |
| Badahdah et al. (2020)        | Oman             | Peer-reviewed      | Non-random      | 509         | N/A           | 37.7          | 407            | Physician: 194<br>Nurse: 315                                                                                                       | 144                                        |
| Cao et al. (2020)             | China            | Preprint           | Non-random      | 102         | 97.1%         | 31.7, 6.8     | 77             | Doctor: 40<br>Nurse: 54<br>Technician: 8                                                                                           | 93                                         |
| Chatterjee et al. (2020)      | India            | Peer-reviewed      | Non-random      | 152         | N/A           | 42.1, 12.2    | 33             | Doctor (non-specialist): 44<br>Medical and allied professional: 58<br>Surgery and allied professional: 33<br>Administration: 17    | N/A                                        |
| Chen J et al. (2020)          | China            | Peer-reviewed      | Non-random      | 902         | N/A           | N/A           | 619            | Doctor: 541<br>Nurse: 311<br>Other: 48                                                                                             | N/A                                        |
| Chen Y et al. (2020)          | China            | Peer-reviewed      | Non-random      | 105         | 84.7%         | 32.6, 6.5     | 95             | Medical worker: 105                                                                                                                | N/A                                        |
| Chew et al. (2020)            | Singapore, India | Peer-reviewed      | Non-random      | 906         | N/A           | 29            | 583            | Physician: 268<br>Nurse: 355<br>Allied health: 96<br>Technician: 40<br>Clerical staff: 56<br>Administration: 39<br>Maintenance: 52 |                                            |
| Choudhury et al. (2020)       | UK               | Peer-reviewed      | Non-random      | 106         | N/A           | 41            | 41             | Physician: 23<br>Nurse and allied health: 23<br>Administration: 17                                                                 | 47                                         |
| Chung et al. (2020)           | China; Hong Kong | Peer-reviewed      | Non-random      | 69          | N/A           | N/A           | N/A            | Doctor: 3<br>Nurse: 24<br>Allied health professional: 6<br>Administration: 23<br>Management: 2<br>Other: 3                         | N/A                                        |

| Study                  | Country                          | Publication status | Sampling method | Sample size | Response rate | Age: mean, SD | Gender: female | Occupation                                                                                                | Direct contact with patients with COVID-19 |
|------------------------|----------------------------------|--------------------|-----------------|-------------|---------------|---------------|----------------|-----------------------------------------------------------------------------------------------------------|--------------------------------------------|
| Consolo et al. (2020)  | Italy                            | Peer-reviewed      | Non-random      | 356         | 40.0%         | N/A           | 141            | Dentist: 356                                                                                              | N/A                                        |
| Du et al. (2020)       | China                            | Peer-reviewed      | Non-random      | 134         | 43.1%         | N/A           | 81             | Doctor: 47<br>Nurse: 55<br>Support staff: 32                                                              | N/A                                        |
| Elbay et al. (2020)    | Turkey                           | Peer-reviewed      | Non-random      | 442         | N/A           | 36.1, 8.7     | 251            | Surgical specialist: 75<br>Non-surgical specialist: 344<br>Basic medical sciences: 18                     | 231                                        |
| Evanoff et al. (2020)  | USA                              | Peer-reviewed      | Non-random      | 5,550       | 34.4%         | N/A           | 4,374          | Faculty: 870<br>Staff: 4,470<br>Post-doctoral scholars: 210                                               | 425                                        |
| Gu et al. (2020)       | China                            | Peer-reviewed      | Non-random      | 564         | 100%          | N/A           | N/A            | Nurse: 564                                                                                                | 564                                        |
| Guiroy et al. (2020)   | Argentina, Brazil, Chile, Mexico | Peer-reviewed      | Non-random      | 204         | 43.3%         | 47.8          | 7              | Orthopaedist: 120<br>Neurosurgeon: 84                                                                     | N/A                                        |
| Guo et al. (2020)      | China                            | Peer-reviewed      | Non-random      | 11,118      | N/A           | N/A           | 8,316          | Physician: 3,351<br>Nurse: 5,900<br>Medical student: 757<br>Medical assistant: 464<br>Administration: 450 | 3,351                                      |
| Gupta et al. (2020)    | India                            | Peer-reviewed      | Non-random      | 123         | N/A           | N/A           | N/A            | Health professional: 123                                                                                  | N/A                                        |
| Huang JZ et al. (2020) | China                            | Peer-reviewed      | Random          | 230         | 93.5%         | N/A           | 187            | Doctor: 70<br>Nurse: 160                                                                                  | N/A                                        |
| Huang Y et al. (2020)  | China                            | Peer-reviewed      | Non-random      | 2,250       | N/A           | N/A           | N/A            | Health professional: 2,250                                                                                | N/A                                        |
| Kounou et al. (2020)   | Togo                             | Peer-reviewed      | Non-random      | 62          | N/A           | N/A           | 35             | Medical professional: 62                                                                                  | N/A                                        |
| Lai et al. (2020)      | China                            | Peer-reviewed      | Random          | 1,257       | 68.7%         | N/A           | 964            | Physician: 493<br>Nurse: 764                                                                              | 522                                        |
| Lam et al. (2020)      | China; Hong Kong                 | Peer-reviewed      | Non-random      | 932         | N/A           | N/A           | 701            | Physician: 263<br>Nurse: 580<br>Other: 89                                                                 | 359                                        |
| Li G et al. (2020)     | China                            | Peer-reviewed      | Non-random      | 4,369       | 82.2%         | N/A           | 4,369          | Doctor: 582<br>Nurse: 3,380<br>Medical technician: 407                                                    | N/A                                        |
| Li J et al. (2020)     | China                            | Preprint           | Non-random      | 4,004       | N/A           | N/A           | 2,238          | Public health worker: 6,317                                                                               | N/A                                        |

| Study                      | Country | Publication status | Sampling method | Sample size | Response rate | Age: mean, SD | Gender: female | Occupation                                                                                                  | Direct contact with patients with COVID-19 |
|----------------------------|---------|--------------------|-----------------|-------------|---------------|---------------|----------------|-------------------------------------------------------------------------------------------------------------|--------------------------------------------|
| Li RL et al. (2020)        | China   | Peer-reviewed      | Non-random      | 66          | 97.1%         | N/A           | 51             | Nurse: 66                                                                                                   | 66                                         |
| Li Z et al. (2020)         | China   | Peer-reviewed      | Random          | 130         | 97.7%         | 36.1, 5.6     | 121            | Nurse: 130                                                                                                  | 130                                        |
| Liu S et al. (2020)        | China   | Peer-reviewed      | Non-random      | 6,588       | N/A           | N/A           | 4,370          | Medical professional: 2,543<br>Nurse: 3,888<br>Allied health: 150<br>Auxiliary services: 27                 | N/A                                        |
| Liu X et al. (2020)        | China   | Preprint           | Non-random      | 258         | N/A           | N/A           | 173            | Medical staff: 258                                                                                          | 96                                         |
| Liu Y et al. (2020)        | China   | Preprint           | Non-random      | 1,315       | N/A           | 37            | 999            | Physician: 512<br>Nurse: 577<br>Technician: 120<br>Hygienist: 106                                           | 1,315                                      |
| Liu Z et al. (2020)        | China   | Preprint           | Non-random      | 4,679       | N/A           | 35.9, 9       | 3,849          | Doctor: 1,853<br>Nurse: 2,826                                                                               | 1,437                                      |
| Lu et al. (2020)           | China   | Peer-reviewed      | Non-random      | 2,042       | N/A           | N/A           | 1,785          | Medical staff: 2,042                                                                                        | N/A                                        |
| Lv et al. (2020)           | China   | Preprint           | Non-random      | 8,028       | N/A           | N/A           | N/A            | Medical staff: 8,028                                                                                        | N/A                                        |
| Naser et al. (2020)        | Jordan  | Peer-reviewed      | Non-random      | 1,163       | N/A           | N/A           | 653            | Physician: 560<br>General practitioner: 100<br>Nurse: 151<br>Allied health: 74<br>Pharmacist: 378           | 617                                        |
| Ni et al. (2020)           | China   | Peer-reviewed      | Non-random      | 214         | N/A           | N/A           | 148            | Doctor: 81<br>Nurse: 108<br>Other: 25                                                                       | 55                                         |
| Pouralizadeh et al. (2020) | Iran    | Peer-reviewed      | Non-random      | 441         | N/A           | 36.3, 8.7     | 420            | Nurse: 441                                                                                                  | 412                                        |
| Qi et al. (2020)           | China   | Peer-reviewed      | Non-random      | 400         | 100%          | N/A           | 295            | Nurse: 400                                                                                                  | 30                                         |
| Que et al. (2020)          | China   | Peer-reviewed      | Non-random      | 2,285       | N/A           | 31.1          | 1,578          | Physician: 860<br>Medical resident: 913<br>Nurse: 208<br>Technician: 179<br>Public health professional: 125 | N/A                                        |
| Rossi et al. (2020)        | Italy   | Peer-reviewed      | Non-random      | 1,379       | 49.0%         | 39            | 1,064          | Physician: 433<br>Nurse: 472<br>General practitioner: 86<br>Health care assistant: 112<br>Other: 275        | 725                                        |

| Study                    | Country      | Publication status | Sampling method | Sample size | Response rate | Age: mean, SD | Gender: female | Occupation                                                                                                                                  | Direct contact with patients with COVID-19 |
|--------------------------|--------------|--------------------|-----------------|-------------|---------------|---------------|----------------|---------------------------------------------------------------------------------------------------------------------------------------------|--------------------------------------------|
| Salman et al. (2020)     | Pakistan     | Preprint           | Non-random      | 398         | N/A           | 28.7          | 215            | Doctor: 205<br>Nurse: 133<br>Pharmacist: 60                                                                                                 | N/A                                        |
| Shechter et al. (2020)   | USA          | Peer-reviewed      | Non-random      | 657         | 13.7%         | N/A           | 509            | Attending physician: 141<br>Resident or fellow: 141<br>Nurse: 313<br>Advanced practice provider: 48                                         | N/A                                        |
| Si et al. (2020)         | China        | Peer-reviewed      | Non-random      | 863         | 76.0%         | N/A           | 610            | Doctor: 377<br>Nurse: 211<br>Other: 275                                                                                                     | 145                                        |
| Song et al. (2020)       | China        | Peer-reviewed      | Non-random      | 14,825      | N/A           | 34            | 9,536          | Physician: 6,093<br>Nurses: 8,732                                                                                                           | N/A                                        |
| Sun et al. (2020)        | China        | Peer-reviewed      | Random          | 121         | 97.6%         | 35.1, 8.9     | 81             | Doctor: 27<br>Nurse: 94                                                                                                                     | N/A                                        |
| Sung et al. (2020)       | Taiwan       | Preprint           | Non-random      | 1,795       | N/A           | 36.7          | 1,435          | Doctor: 357<br>Nurse: 1,064<br>Pharmacist: 20<br>Medical technician: 93<br>Radiation technician: 91                                         | N/A                                        |
| Taghizadeh et al. (2020) | Iran         | Preprint           | Non-random      | 487         | 59.0%         | N/A           | N/A            | Doctor: 127<br>Nurse: 105<br>Health staff: 229<br>Lab staff: 26                                                                             | N/A                                        |
| Tang et al. (2020)       | China        | Peer-reviewed      | Non-random      | 44          | 100%          | 33.6, 6.4     | 34             | Nurse: 441                                                                                                                                  | 31                                         |
| Temsah et al. (2020)     | Saudi Arabia | Peer-reviewed      | Non-random      | 582         | 71.8%         | 36            | 437            | Senior physician: 56<br>Registrar physician: 52<br>Resident physician: 48<br>Intern: 34<br>Nurse and midwife: 363<br>Auxiliary services: 29 | N/A                                        |
| Tu et al. (2020)         | China        | Peer-reviewed      | Random          | 100         | 100%          | 34.4          | 100            | Nurse: 100                                                                                                                                  | 100                                        |
| Wang Q et al. (2020)     | China        | Peer-reviewed      | Non-random      | 342         | N/A           | N/A           | 314            | Nurse: 342                                                                                                                                  | N/A                                        |
| Wang YX et al. (2020)    | China        | Peer-reviewed      | Non-random      | 202         | 95.7%         | N/A           | 177            | Nurse: 202                                                                                                                                  | N/A                                        |
| Weilenmann et al. (2020) | Switzerland  | Preprint           | Non-random      | 1,410       | N/A           | 34            | 934            | Physician: 857<br>Nurse: 553                                                                                                                | 1,103                                      |
| Xiao et al. (2020)       | China        | Peer-reviewed      | Non-random      | 958         | N/A           | N/A           | 644            | Physician: 378<br>Nurse: 359<br>Technician: 119                                                                                             | 678                                        |

| Study                  | Country | Publication status | Sampling method | Sample size | Response rate | Age: mean, SD | Gender: female | Occupation                                                                                                                         | Direct contact with patients with COVID-19 |
|------------------------|---------|--------------------|-----------------|-------------|---------------|---------------|----------------|------------------------------------------------------------------------------------------------------------------------------------|--------------------------------------------|
| Xie et al. (2020)      | China   | Peer-reviewed      | Non-random      | 394         | 100%          | 38.8, 9.7     | 296            | Doctor: 136<br>Nurse: 258                                                                                                          | N/A                                        |
| Yao et al. (2020)      | China   | Peer-reviewed      | Non-random      | 95          | N/A           | N/A           | 82             | Physician: 34<br>Nurse: 61                                                                                                         | 95                                         |
| Ye et al. (2020)       | China   | Peer-reviewed      | Non-random      | 2,140       | 99.6%         | N/A           | 1,644          | Nurse: 2,140                                                                                                                       | N/A                                        |
| Yin et al. (2020)      | China   | Peer-reviewed      | Non-random      | 1,266       | 97.5%         | N/A           | 946            | Doctor: 504<br>Nurse: 766                                                                                                          | N/A                                        |
| Zhang C et al. (2020)  | China   | Peer-reviewed      | Non-random      | 1,563       | N/A           | N/A           | 1,293          | Doctor: 454<br>Nurse: 984<br>Administration: 30<br>Other: 95                                                                       | 689                                        |
| Zhang S et al. (2020)  | Iran    | Peer-review        | Non-random      | 304         | N/A           | 35.1          | 178            | Health worker: 304                                                                                                                 | N/A                                        |
| Zhang WR et al. (2020) | China   | Peer-review        | Non-random      | 927         | N/A           | N/A           | 678            | Medical worker: 927<br>Non-medical worker: 1,255                                                                                   | 138                                        |
| Zhao YJ et al. (2020)  | China   | Peer-review        | Non-random      | 209         | 99.5%         | N/A           | 130            | Chief physician: 2<br>Deputy chief physician: 18<br>Attending physician: 106<br>Resident physician: 52<br>General practitioner: 31 | N/A                                        |
| Zhao YP et al. (2020)  | China   | Peer-review        | Non-random      | 380         | N/A           | 31.8, 7.3     | 104            | Nurse: 380                                                                                                                         | 18                                         |
| Zhou et al. (2020)     | China   | Preprint           | Non-random      | 210         | 95.4%         | 30.5, 4.5     | 105            | Doctor: 63<br>Nurse: 147                                                                                                           | N/A                                        |
| Zhu JR et al. (2020)   | China   | Peer-reviewed      | Non-random      | 165         | N/A           | 34.2, 8.1     | 137            | Doctor: 79<br>Nurse: 86                                                                                                            | N/A                                        |
| Zhu S et al. (2020)    | China   | Peer-reviewed      | Non-random      | 858         | N/A           | N/A           | 597            | Frontline staff: 320<br>Non-frontline staff: 539                                                                                   | 320                                        |

N/A = Information not provided in the article or non-applicable
