# Supplementary material for: Prevalence of depression, anxiety and post-traumatic stress disorder in health care workers during the COVID-19 pandemic: A systematic review and meta-analysis
Source: PubMed Central journal article supplement (PMC7946321; doi:10.1371/journal.pone.0246454), 2021-03-10
Supplement: pone.0246454.s003.pdf [file pone.0246454.s003.pdf]

### S3 Appendix. Prevalence of depression, anxiety and PTSD at different cut-off scores on the screening tools used

| Study                  | Sample size | Screening tool: Depression | Prevalence; Cut-off score: %                               | Screening tool: Anxiety | Prevalence; Cut-off score: %                              | Screening tool: PTSD | Prevalence; Cut-off score: %                             |
|------------------------|-------------|----------------------------|------------------------------------------------------------|-------------------------|-----------------------------------------------------------|----------------------|----------------------------------------------------------|
| Amerio et al.          | 131         | PHQ-9                      | Moderate ( $\geq 10$ ): 22.9%                              | N/A                     | N/A                                                       | N/A                  | N/A                                                      |
| Apisarnthanarak et al. | 160         | N/A                        | N/A                                                        | GAD-7                   | Mild ( $\geq 5$ ): 42.5%<br>Moderate ( $\geq 10$ ): 19.4% | N/A                  | N/A                                                      |
| Badahdah et al.        | 509         | N/A                        | N/A                                                        | GAD-7                   | Mild ( $\geq 5$ ): 64.6%<br>Moderate ( $\geq 10$ ): 25.9% | N/A                  | N/A                                                      |
| Cao et al.             | 102         | PHQ-9                      | Screen positive ( $\geq 10$ ): 6.9%                        | N/A                     | N/A                                                       | IES-R                | Screening positive ( $\geq 26$ ): 2.9%                   |
| Chatterjee et al.      | 152         | DASS-21                    | Mild ( $\geq 10$ ): 34.9%<br>Moderate ( $\geq 14$ ): 24.3% | DASS-21                 | Mild ( $\geq 8$ ): 39.5%<br>Moderate ( $\geq 10$ ): 31.6% | N/A                  | N/A                                                      |
| Chen J et al.          | 902         | PHQ-9                      | Mild ( $\geq 5$ ): 48.7%<br>Moderate ( $\geq 10$ ): 18.3%  | GAD-7                   | Mild ( $\geq 5$ ): 47.0%<br>Moderate ( $\geq 10$ ): 16.6% | N/A                  | N/A                                                      |
| Chen Y et al.          | 105         | SDS                        | Mild ( $\geq 53$ ): 29.5%<br>Moderate ( $\geq 63$ ): 8.6%  | SAS                     | Mild ( $\geq 50$ ): 18.1%<br>Moderate ( $\geq 60$ ): 7.6% | N/A                  | N/A                                                      |
| Chew et al.            | 906         | DASS-21                    | Mild ( $\geq 9$ ): 10.6%<br>Moderate ( $\geq 14$ ): 5.3%   | DASS-21                 | Mild ( $\geq 7$ ): 15.7%<br>Moderate ( $\geq 10$ ): 8.7%  | IES-R                | Mild ( $\geq 24$ ): 7.4%<br>Moderate ( $\geq 33$ ): 3.8% |
| Choudhury et al.       | 106         | PHQ-9                      | Mild ( $\geq 5$ ): 53.0%<br>Moderate ( $\geq 10$ ): 15.0%  | GAD-7                   | Mild ( $\geq 5$ ): 61.0%<br>Moderate ( $\geq 10$ ): 34.0% | N/A                  | N/A                                                      |
| Chung et al.           | 69          | PHQ-9                      | Mild ( $\geq 10$ ): 34.8%<br>Moderate ( $\geq 15$ ): 14.5% | N/A                     | N/A                                                       | N/A                  | N/A                                                      |
| Consolo et al.         | 356         | N/A                        | N/A                                                        | GAD-7                   | Mild ( $\geq 5$ ): 57.2%<br>Moderate ( $\geq 10$ ): 23.9% | N/A                  | N/A                                                      |
| Du et al.              | 134         | BDI-II                     | Screen positive ( $\geq 14$ ): 12.7%                       | BAI                     | Screening positive ( $\geq 8$ ): 20.1%                    | N/A                  | N/A                                                      |
| Elbay et al.           | 442         | DASS-21                    | Mild: 64.7%<br>Moderate: 47.1%                             | DASS-21                 | Mild: 51.6%<br>Moderate: 35.2%                            | N/A                  | N/A                                                      |
| Evanoff et al.         | 5,550       | DASS-21                    | Moderate: 15.9%                                            | DASS-21                 | Moderate: 13.0%                                           | N/A                  | N/A                                                      |
| Gu et al.              | 564         | SDS                        | Mild: 37.4%<br>Moderate: 17.0%                             | SAS                     | Mild: 30.1%<br>Moderate: 7.3%                             | N/A                  | N/A                                                      |
| Guiroy et al.          | 204         | PHQ-9                      | Moderate ( $\geq 10$ ): 22.1%                              | N/A                     | N/A                                                       | N/A                  | N/A                                                      |
| Guo et al.             | 11,118      | SDS                        | Mild ( $\geq 50$ ): 31.5%<br>Moderate ( $\geq 60$ ): 13.5% | SAS                     | Mild ( $\geq 50$ ): 17.5%<br>Moderate ( $\geq 60$ ): 5.0% | N/A                  | N/A                                                      |
| Gupta et al.           | 123         | PHQ-9                      | Screen positive ( $\geq 5$ ): 42.6%                        | GAD-7                   | Moderate ( $\geq 10$ ): 11.3%                             | N/A                  | N/A                                                      |
| Huang JZ et al.        | 230         | N/A                        | N/A                                                        | SAS                     | Mild ( $\geq 50$ ): 23.0%<br>Moderate ( $\geq 60$ ): 7.0% | PTSD-SS              | Screening positive ( $\geq 50$ ): 27.4%                  |

| Study               | Sample size | Screening tool: Depression | Prevalence; Cut-off score: %                | Screening tool: Anxiety | Prevalence; Cut-off score: %                | Screening tool: PTSD | Prevalence; Cut-off score: % |
|---------------------|-------------|----------------------------|---------------------------------------------|-------------------------|---------------------------------------------|----------------------|------------------------------|
| Huang Y et al.      | 2,250       | CES-D                      | Screen positive (≥28): 19.8%                | GAD-7                   | Screen positive (≥9): 35.6%                 | N/A                  | N/A                          |
| Kounou et al.       | 62          | PHQ-9                      | Mild (≥ 5): 51.6%<br>Moderate (≥ 10): 27.4% | GAD-7                   | Mild (≥ 5): 62.9%<br>Moderate (≥ 10): 37.1% | N/A                  | N/A                          |
| Lai et al.          | 1,257       | PHQ-9                      | Mild (≥5): 50.4%<br>Moderate (≥10): 14.8%   | GAD-7                   | Mild (≥5): 44.6%<br>Moderate (≥10): 12.3%   | N/A                  | N/A                          |
| Lam et al.          | 932         | PHQ-9                      | Screen positive (≥9): 24.4%                 | N/A                     | N/A                                         | N/A                  | N/A                          |
| Li G et al.         | 4,369       | PHQ-9                      | Screen positive (≥10): 14.2%                | GAD-7                   | Screen positive (≥8): 25.2%                 | IES-R                | Screen positive (≥33): 31.6% |
| Li J et al.         | 6,317       | PHQ-9                      | Moderate (≥10): 21.3%                       | GAD-7                   | Moderate (≥10): 19.0%                       | N/A                  | N/A                          |
| Li RL et al.        | 66          | N/A                        | N/A                                         | HAMA                    | Screen positive (≥14): 77.3%                | N/A                  | N/A                          |
| Li Z et al.         | 130         | DASS-21                    | Screen positive (≥10): 26.2%                | DASS-21                 | Screen positive (≥8): 77.7%                 | N/A                  | N/A                          |
| Liu S et al.        | 6,588       | PHQ-9                      | Moderate (≥10): 57.6%                       | N/A                     | N/A                                         | N/A                  | N/A                          |
| Liu X et al.        | 258         | PHQ-4                      | Screen positive (≥3): 20.9%                 | PHQ-4                   | Screen positive (≥3): 19.8%                 | N/A                  | N/A                          |
| Liu Y et al.        | 1,315       | PHQ-9                      | Moderate (≥10): 12.5%                       | GAD-7                   | Mild (≥5): 38.7%<br>Moderate (≥10): 10.7%   | N/A                  | N/A                          |
| Liu Z et al.        | 4,679       | SDS                        | Mild (≥50): 34.6%<br>Moderate (≥60): 19.7%  | SAS                     | Mild (≥50): 16.0%<br>Moderate (≥60): 5.2%   | N/A                  | N/A                          |
| Lu et al.           | 2,042       | HAMD                       | Mild (≥7): 12.1%                            | HAMA                    | Mild (≥7): 25.5%                            | N/A                  | N/A                          |
| Lv et al.           | 8,028       | N/A                        | N/A                                         | GAD-7                   | Screen positive: 34.7%                      | N/A                  | N/A                          |
| Naser et al.        | 1,163       | PHQ-9                      | Mild (≥5): 78.1%<br>Moderate (≥10): 44.8%   | GAD-7                   | Mild (≥5): 70.8%<br>Moderate (≥10): 32.8%   | N/A                  | N/A                          |
| Ni et al.           | 214         | PHQ-2                      | Screen positive (≥3): 19.2%                 | GAD-2                   | Screen positive (≥3): 22.0%                 | N/A                  | N/A                          |
| Pouralizadeh et al. | 441         | PHQ-9                      | Mild (≥5): 71.0%<br>Moderate (≥10): 37.4%   | GAD-7                   | Mild (≥5): 73.5%<br>Moderate (≥10): 38.8%   | N/A                  | N/A                          |
| Qi et al.           | 400         | SDS                        | Mild (≥50): 98.0%<br>Moderate (≥60): 26.0%  | SAS                     | Mild (≥50): 31.0%<br>Moderate (≥60): 7.0%   | N/A                  | N/A                          |
| Que et al.          | 2,285       | PHQ-9                      | Mild (≥5): 55.6%<br>Moderate (≥10): 12.8%   | GAD-7                   | Mild (≥5): 46.0%<br>Moderate (≥10): 11.6%   | N/A                  | N/A                          |
| Rossi et al.        | 1,379       | PHQ-9                      | Screen positive (≥15): 24.7%                | GAD-7                   | Screening positive (≥15): 19.8%             | GPS-PTSD             | Screening positive: 49.5%    |
| Salman et al.       | 398         | PHQ-9                      | Mild (≥5): 63.8%<br>Moderate (≥10): 21.9%   | GAD-7                   | Moderate (≥10): 21.4%                       | N/A                  | N/A                          |
| Shechter et al.     | 657         | PHQ-2                      | Screen positive (≥3): 48.0%                 | GAD-2                   | Screen positive (≥3): 33.0%                 | N/A                  | N/A                          |
| Si et al.           | 863         | DASS-21                    | Mild: 13.6%<br>Moderate: 6.0%               | DASS-21                 | Mild: 13.9%<br>Moderate: 10.9%              | IES-6                | Screening positive: 40.2%    |

| Study             | Sample size | Screening tool: Depression | Prevalence; Cut-off score: %                               | Screening tool: Anxiety | Prevalence; Cut-off score: %                               | Screening tool: PTSD | Prevalence; Cut-off score: %                              |
|-------------------|-------------|----------------------------|------------------------------------------------------------|-------------------------|------------------------------------------------------------|----------------------|-----------------------------------------------------------|
| Song et al.       | 14,825      | CES-D                      | Screen positive ( $\geq 16$ ): 25.2%                       | N/A                     | N/A                                                        | PCL-5                | Screening positive ( $\geq 33$ ): 9.1%                    |
| Sun et al.        | 121         | PHQ-9                      | Mild ( $\geq 5$ ): 43.0%<br>Moderate ( $\geq 10$ ): 13.2%  | GAD-7                   | Mild ( $\geq 5$ ): 58.7%<br>Moderate ( $\geq 10$ ): 9.1%   | N/A                  | N/A                                                       |
| Sung et al.       | 1,795       | CES-D-10                   | Screen positive ( $\geq 10$ ): 45.5%                       | STAI-6                  | Mild ( $\geq 37$ ): 100%<br>Moderate ( $\geq 44$ ): 89.7%  | N/A                  | N/A                                                       |
| Taghizadeh et al. | 487         | HADS                       | Mild ( $\geq 8$ ): 48.3%<br>Moderate ( $\geq 11$ ): 24.8%  | HADS                    | Mild ( $\geq 8$ ): 62.8%<br>Moderate ( $\geq 11$ ): 34.3%  | N/A                  | N/A                                                       |
| Tang et al.       | 44          | SDS                        | Mild ( $\geq 50$ ): 45.5%<br>Moderate ( $\geq 60$ ): 18.2% | SAS                     | Mild ( $\geq 50$ ): 31.8%<br>Moderate ( $\geq 60$ ): 9.1%  | N/A                  | N/A                                                       |
| Temsah et al.     | 582         | N/A                        | N/A                                                        | GAD-7                   | Mild ( $\geq 5$ ): 31.8%<br>Moderate ( $\geq 10$ ): 11.0%  | N/A                  | N/A                                                       |
| Tu et al.         | 100         | PHQ-9                      | Mild ( $\geq 4$ ): 46.0%<br>Moderate: 10.0%                | GAD-7                   | Mild ( $\geq 4$ ): 40.0%<br>Moderate: 7.0%                 | N/A                  | N/A                                                       |
| Wang Q et al.     | 342         | HADS                       | Mild ( $\geq 8$ ): 26.6%<br>Moderate ( $\geq 11$ ): 10.5%  | HADS                    | Mild ( $\geq 8$ ): 28.1%<br>Moderate ( $\geq 11$ ): 11.7%  | N/A                  | N/A                                                       |
| Wang YX et al.    | 202         | N/A                        | N/A                                                        | N/A                     | N/A                                                        | PCL-C                | Screening positive ( $\geq 38$ ): 16.8%                   |
| Weilenmann et al. | 1,410       | PHQ-9                      | Moderate ( $\geq 10$ ): 20.7%                              | GAD-7                   | Moderate ( $\geq 10$ ): 25.9%                              | N/A                  | N/A                                                       |
| Xiao et al.       | 958         | HADS                       | Mild ( $\geq 8$ ): 57.3%                                   | HADS                    | Mild ( $\geq 8$ ): 54.1%                                   | N/A                  | N/A                                                       |
| Xie et al.        | 394         | N/A                        | N/A                                                        | SAS                     | Mild ( $\geq 50$ ): 35.0%<br>Moderate ( $\geq 60$ ): 15.0% | N/A                  | N/A                                                       |
| Yao et al.        | 95          | PHQ-9                      | Mild ( $\geq 5$ ): 47.4%<br>Moderate ( $\geq 10$ ): 20.0%  | GAD-7                   | Mild ( $\geq 5$ ): 50.5%<br>Moderate ( $\geq 14$ ): 14.7%  | N/A                  | N/A                                                       |
| Ye et al.         | 2,140       | N/A                        | N/A                                                        | GAD-7                   | Mild ( $\geq 5$ ): 43.6%<br>Moderate ( $\geq 10$ ): 12.0%  | N/A                  | N/A                                                       |
| Yin et al.        | 1,266       | AFS                        | Mild ( $\geq 5$ ): 27.5%<br>Moderate ( $\geq 11$ ): 10.2%  | AFS                     | Mild ( $\geq 7$ ): 26.3%<br>Moderate ( $\geq 12$ ): 11.7%  | N/A                  | N/A                                                       |
| Zhang C et al.    | 1,563       | PHQ-9                      | Mild ( $\geq 5$ ): 50.6%<br>Moderate ( $\geq 10$ ): 17.2%  | GAD-7                   | Mild ( $\geq 5$ ): 44.7%<br>Moderate ( $\geq 10$ ): 12.9%  | IES-R                | Mild ( $\geq 9$ ): 73.4%<br>Moderate ( $\geq 26$ ): 37.4% |
| Zhang S et al.    | 304         | PHQ-4                      | Screen positive ( $\geq 3$ ): 20.6%                        | PHQ-4                   | Screen positive ( $\geq 3$ ): 28.0%                        | N/A                  | N/A                                                       |
| Zhang WR et al.   | 927         | PHQ-2                      | Screen positive ( $\geq 3$ ): 12.2%                        | GAD-2                   | Screen positive ( $\geq 3$ ): 13.0%                        | N/A                  | N/A                                                       |

| Study          | Sample size | Screening tool: Depression | Prevalence; Cut-off score: %                              | Screening tool: Anxiety | Prevalence; Cut-off score: %                              | Screening tool: PTSD | Prevalence; Cut-off score: % |
|----------------|-------------|----------------------------|-----------------------------------------------------------|-------------------------|-----------------------------------------------------------|----------------------|------------------------------|
| Zhao YJ et al. | 209         | PHQ-9                      | Mild ( $\geq 5$ ): 34.4%<br>Moderate ( $\geq 10$ ): 10.5% | GAD-7                   | Mild ( $\geq 5$ ): 37.3%<br>Moderate ( $\geq 10$ ): 12.0% | N/A                  | N/A                          |
| Zhao YP et al. | 380         | PHQ-9                      | Mild ( $\geq 5$ ): 64.5%<br>Moderate ( $\geq 10$ ): 21.1% | GAD-7                   | Mild ( $\geq 5$ ): 51.3%<br>Moderate ( $\geq 10$ ): 9.5%  | N/A                  | N/A                          |
| Zhou et al.    | 210         | PHQ-9                      | Mild ( $\geq 5$ ): 72.0%<br>Moderate ( $\geq 10$ ): 49.6% | GAD-7                   | Mild ( $\geq 5$ ): 91.0%<br>Moderate ( $\geq 10$ ): 76.6% | N/A                  | N/A                          |
| Zhu JR et al.  | 165         | SDS                        | Screen positive ( $\geq 50$ ): 44.2%                      | SAS                     | Screen positive ( $\geq 50$ ): 20.0%                      | N/A                  | N/A                          |
| Zhu S et al.   | 858         | PHQ-9                      | Screen positive ( $\geq 5$ ): 19.2%                       | GAD-7                   | Screen positive ( $\geq 5$ ): 18.0%                       | N/A                  | N/A                          |

Abbreviation: AFS = Air Force Military Medical University Scale; BAI = Beck Anxiety Inventory; BDI = Beck Depression Inventory; CES-D = Center for Epidemiologic Studies Depression Scale; DASS = Depression Anxiety Stress Scales; GAD = Generalised Anxiety Disorder Assessment; GPS-PTSD = Global Psychotrauma Screen; HADS = Hospital Anxiety and Depression Scale; HAMA = Hamilton Anxiety Rating Scale; IES-R = Impact of Events Scale – Revised; PCL = PTSD Checklist; PCL-C = PTSD Checklist – Civilian Version; PHQ = Patient Health Questionnaire; PTSD-SS = Post-Traumatic Stress Disorder Self-Rating Scale; SAS = Zung’s Self-Rating Anxiety Scale; SDS = Zung’s Self-Rating Depression Scale; STAI = State Trait Anxiety Inventory

Screen positive = Proportion of participants scoring at or above the cut-off defined by the author to indicate clinically relevant depression, anxiety or PTSD
