# Supplementary material for: Prevalence of depression, anxiety and post-traumatic stress disorder in health care workers during the COVID-19 pandemic: A systematic review and meta-analysis
Source: PubMed Central journal article supplement (PMC7946321; doi:10.1371/journal.pone.0246454), 2021-03-10
Supplement: pone.0246454.s004.pdf [file pone.0246454.s004.pdf]

#### S4 Appendix. Quality assessment and risk of study bias

| Study                         | 1. Is the source population representative of the population of interest? | 2. Is the response rate adequate? | 3. Is there little missing data? | 4. Is the survey clinically sensible? | 5. Is there any evidence for the reliability and validity of the survey instrument? |
|-------------------------------|---------------------------------------------------------------------------|-----------------------------------|----------------------------------|---------------------------------------|-------------------------------------------------------------------------------------|
| Amerio et al. (2020)          | Orange                                                                    | Yellow                            | Green                            | Green                                 | Green                                                                               |
| Apisarnthanarak et al. (2020) | Orange                                                                    | Orange                            | Yellow                           | Green                                 | Green                                                                               |
| Badahdah et al. (2020)        | Yellow                                                                    | Yellow                            | Green                            | Green                                 | Green                                                                               |
| Cao et al. (2020)             | Orange                                                                    | Green                             | Green                            | Green                                 | Green                                                                               |
| Chatterjee et al. (2020)      | Orange                                                                    | Orange                            | Yellow                           | Green                                 | Green                                                                               |
| Chen J et al. (2020)          | Yellow                                                                    | Yellow                            | Green                            | Green                                 | Green                                                                               |
| Chen Y et al. (2020)          | Orange                                                                    | Green                             | Yellow                           | Green                                 | Green                                                                               |
| Chew et al. (2020)            | Yellow                                                                    | Yellow                            | Green                            | Green                                 | Green                                                                               |
| Choudhury et al. (2020)       | Orange                                                                    | Yellow                            | Yellow                           | Green                                 | Green                                                                               |
| Chung et al. (2020)           | Orange                                                                    | Orange                            | Green                            | Green                                 | Green                                                                               |
| Consolo et al. (2020)         | Orange                                                                    | Red                               | Yellow                           | Green                                 | Green                                                                               |
| Du et al. (2020)              | Yellow                                                                    | Yellow                            | Yellow                           | Green                                 | Green                                                                               |
| Elbay et al. (2020)           | Orange                                                                    | Orange                            | Yellow                           | Green                                 | Green                                                                               |
| Evanoff et al. (2020)         | Yellow                                                                    | Red                               | Yellow                           | Green                                 | Green                                                                               |
| Gu et al. (2020)              | Red                                                                       | Green                             | Yellow                           | Green                                 | Green                                                                               |
| Guiroy et al. (2020)          | Yellow                                                                    | Orange                            | Green                            | Green                                 | Green                                                                               |
| Guo et al. (2020)             | Yellow                                                                    | Orange                            | Yellow                           | Green                                 | Green                                                                               |
| Gupta et al. (2020)           | Orange                                                                    | Orange                            | Yellow                           | Green                                 | Green                                                                               |
| Huang JZ et al. (2020)        | Orange                                                                    | Orange                            | Yellow                           | Green                                 | Yellow                                                                              |
| Huang Y et al. (2020)         | Red                                                                       | Yellow                            | Yellow                           | Green                                 | Green                                                                               |
| Kounou et al. (2020)          | Orange                                                                    | Orange                            | Yellow                           | Green                                 | Green                                                                               |
| Lai et al. (2020)             | Green                                                                     | Green                             | Green                            | Green                                 | Green                                                                               |
| Lam et al. (2020)             | Orange                                                                    | Orange                            | Green                            | Green                                 | Green                                                                               |
| Li G et al. (2020)            | Yellow                                                                    | Green                             | Yellow                           | Green                                 | Green                                                                               |
| Li J et al. (2020)            | Yellow                                                                    | Yellow                            | Orange                           | Green                                 | Green                                                                               |
| Li RL et al. (2020)           | Orange                                                                    | Green                             | Green                            | Green                                 | Green                                                                               |
| Li Z et al. (2020)            | Orange                                                                    | Green                             | Yellow                           | Green                                 | Green                                                                               |
| Liu S et al. (2020)           | Yellow                                                                    | Orange                            | Yellow                           | Green                                 | Green                                                                               |
| Liu X et al. (2020)           | Orange                                                                    | Orange                            | Green                            | Green                                 | Green                                                                               |
| Liu Y et al. (2020)           | Yellow                                                                    | Yellow                            | Yellow                           | Green                                 | Green                                                                               |
| Liu Z et al. (2020)           | Yellow                                                                    | Orange                            | Yellow                           | Green                                 | Green                                                                               |
| Lu et al. (2020)              | Orange                                                                    | Yellow                            | Yellow                           | Green                                 | Green                                                                               |
| Lv et al. (2020)              | Yellow                                                                    | Orange                            | Orange                           | Yellow                                | Green                                                                               |
| Naser et al. (2020)           | Yellow                                                                    | Yellow                            | Green                            | Green                                 | Green                                                                               |
| Ni et al. (2020)              | Orange                                                                    | Orange                            | Green                            | Green                                 | Green                                                                               |
| Pouralizadeh et al. (2020)    | Orange                                                                    | Orange                            | Yellow                           | Green                                 | Green                                                                               |
| Qi et al. (2020)              | Red                                                                       | Green                             | Yellow                           | Green                                 | Green                                                                               |
| Que et al. (2020)             | Yellow                                                                    | Yellow                            | Yellow                           | Green                                 | Green                                                                               |
| Rossi et al. (2020)           | Yellow                                                                    | Orange                            | Yellow                           | Green                                 | Green                                                                               |
| Salman et al. (2020)          | Yellow                                                                    | Yellow                            | Green                            | Green                                 | Green                                                                               |
| Shechter et al. (2020)        | Red                                                                       | Red                               | Yellow                           | Green                                 | Green                                                                               |
| Si et al. (2020)              | Yellow                                                                    | Green                             | Green                            | Green                                 | Green                                                                               |
| Song et al. (2020)            | Yellow                                                                    | Yellow                            | Yellow                           | Green                                 | Green                                                                               |

| Study                    | 1. Is the source population representative of the population of interest? | 2. Is the response rate adequate? | 3. Is there little missing data? | 4. Is the survey clinically sensible? | 5. Is there any evidence for the reliability and validity of the survey instrument? |
|--------------------------|---------------------------------------------------------------------------|-----------------------------------|----------------------------------|---------------------------------------|-------------------------------------------------------------------------------------|
| Sun et al. (2020)        | Green                                                                     | Green                             | Yellow                           | Green                                 | Green                                                                               |
| Sung et al. (2020)       | Orange                                                                    | Yellow                            | Yellow                           | Green                                 | Green                                                                               |
| Taghizadeh et al. (2020) | Yellow                                                                    | Yellow                            | Green                            | Green                                 | Green                                                                               |
| Tang et al. (2020)       | Red                                                                       | Green                             | Yellow                           | Green                                 | Green                                                                               |
| Temsah et al. (2020)     | Yellow                                                                    | Green                             | Yellow                           | Green                                 | Green                                                                               |
| Tu et al. (2020)         | Green                                                                     | Green                             | Yellow                           | Green                                 | Green                                                                               |
| Wang Q et al. (2020)     | Yellow                                                                    | Yellow                            | Yellow                           | Green                                 | Green                                                                               |
| Wang YX et al. (2020)    | Orange                                                                    | Green                             | Yellow                           | Green                                 | Green                                                                               |
| Weilenmann et al. (2020) | Yellow                                                                    | Orange                            | Green                            | Green                                 | Green                                                                               |
| Xiao et al. (2020)       | Yellow                                                                    | Yellow                            | Yellow                           | Green                                 | Green                                                                               |
| Xie et al. (2020)        | Red                                                                       | Green                             | Yellow                           | Green                                 | Green                                                                               |
| Yao et al. (2020)        | Orange                                                                    | Orange                            | Green                            | Green                                 | Green                                                                               |
| Ye et al. (2020)         | Yellow                                                                    | Green                             | Yellow                           | Green                                 | Green                                                                               |
| Yin et al. (2020)        | Yellow                                                                    | Green                             | Green                            | Yellow                                | Yellow                                                                              |
| Zhang C et al. (2020)    | Yellow                                                                    | Orange                            | Yellow                           | Green                                 | Green                                                                               |
| Zhang S et al. (2020)    | Yellow                                                                    | Yellow                            | Green                            | Yellow                                | Yellow                                                                              |
| Zhang WR et al. (2020)   | Yellow                                                                    | Orange                            | Yellow                           | Green                                 | Green                                                                               |
| Zhao YJ et al. (2020)    | Yellow                                                                    | Green                             | Yellow                           | Green                                 | Green                                                                               |
| Zhao YP et al. (2020)    | Orange                                                                    | Orange                            | Green                            | Green                                 | Green                                                                               |
| Zhou et al. (2020)       | Orange                                                                    | Orange                            | Orange                           | Green                                 | Orange                                                                              |
| Zhu JR et al. (2020)     | Orange                                                                    | Orange                            | Yellow                           | Green                                 | Green                                                                               |
| Zhu S et al. (2020)      | Yellow                                                                    | Orange                            | Yellow                           | Green                                 | Green                                                                               |

### Key

|                                   |        |
|-----------------------------------|--------|
| Definitely yes (low risk of bias) | Green  |
| Probably yes                      | Yellow |
| Probably no                       | Orange |
| Definitely no (high risk of bias) | Red    |
