# Supplementary material for: Prevalence of depression, anxiety and post-traumatic stress disorder in health care workers during the COVID-19 pandemic: A systematic review and meta-analysis
Source: PubMed Central journal article supplement (PMC7946321; doi:10.1371/journal.pone.0246454), 2021-03-10

**S5A Appendix. Assessment of publication bias by Begg's funnel plot and Egger's test for the studies reporting on the prevalence of depression in health care workers during the COVID-19 pandemic**

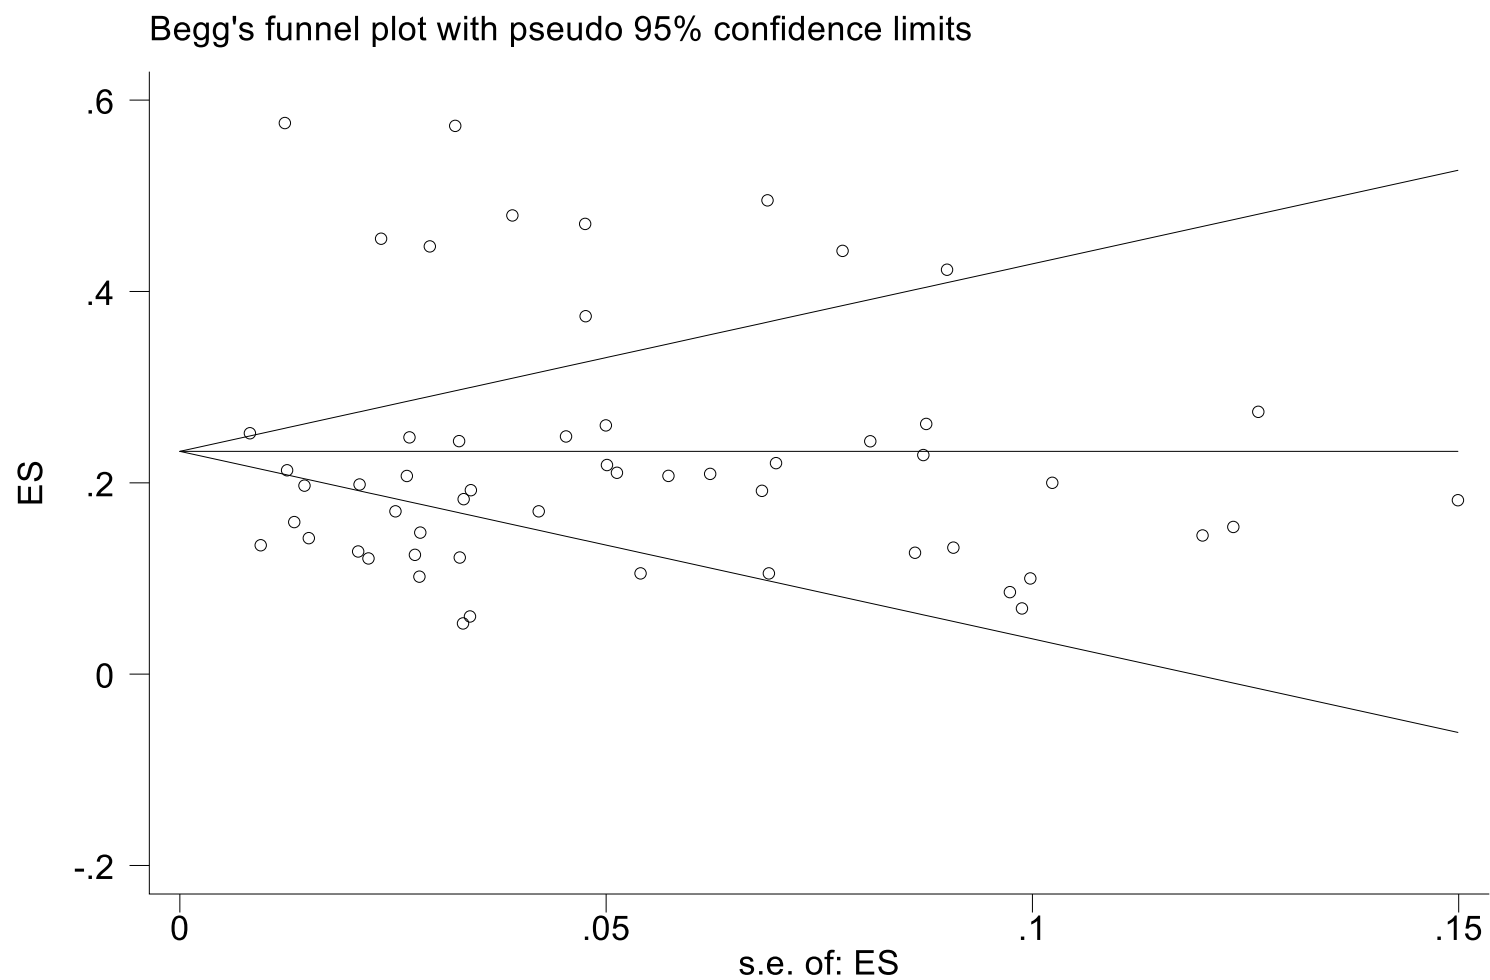

Egger's test:  $p=0.896$

## S5B Appendix. Meta-analysis and pooled estimate of mild depression among health care workers

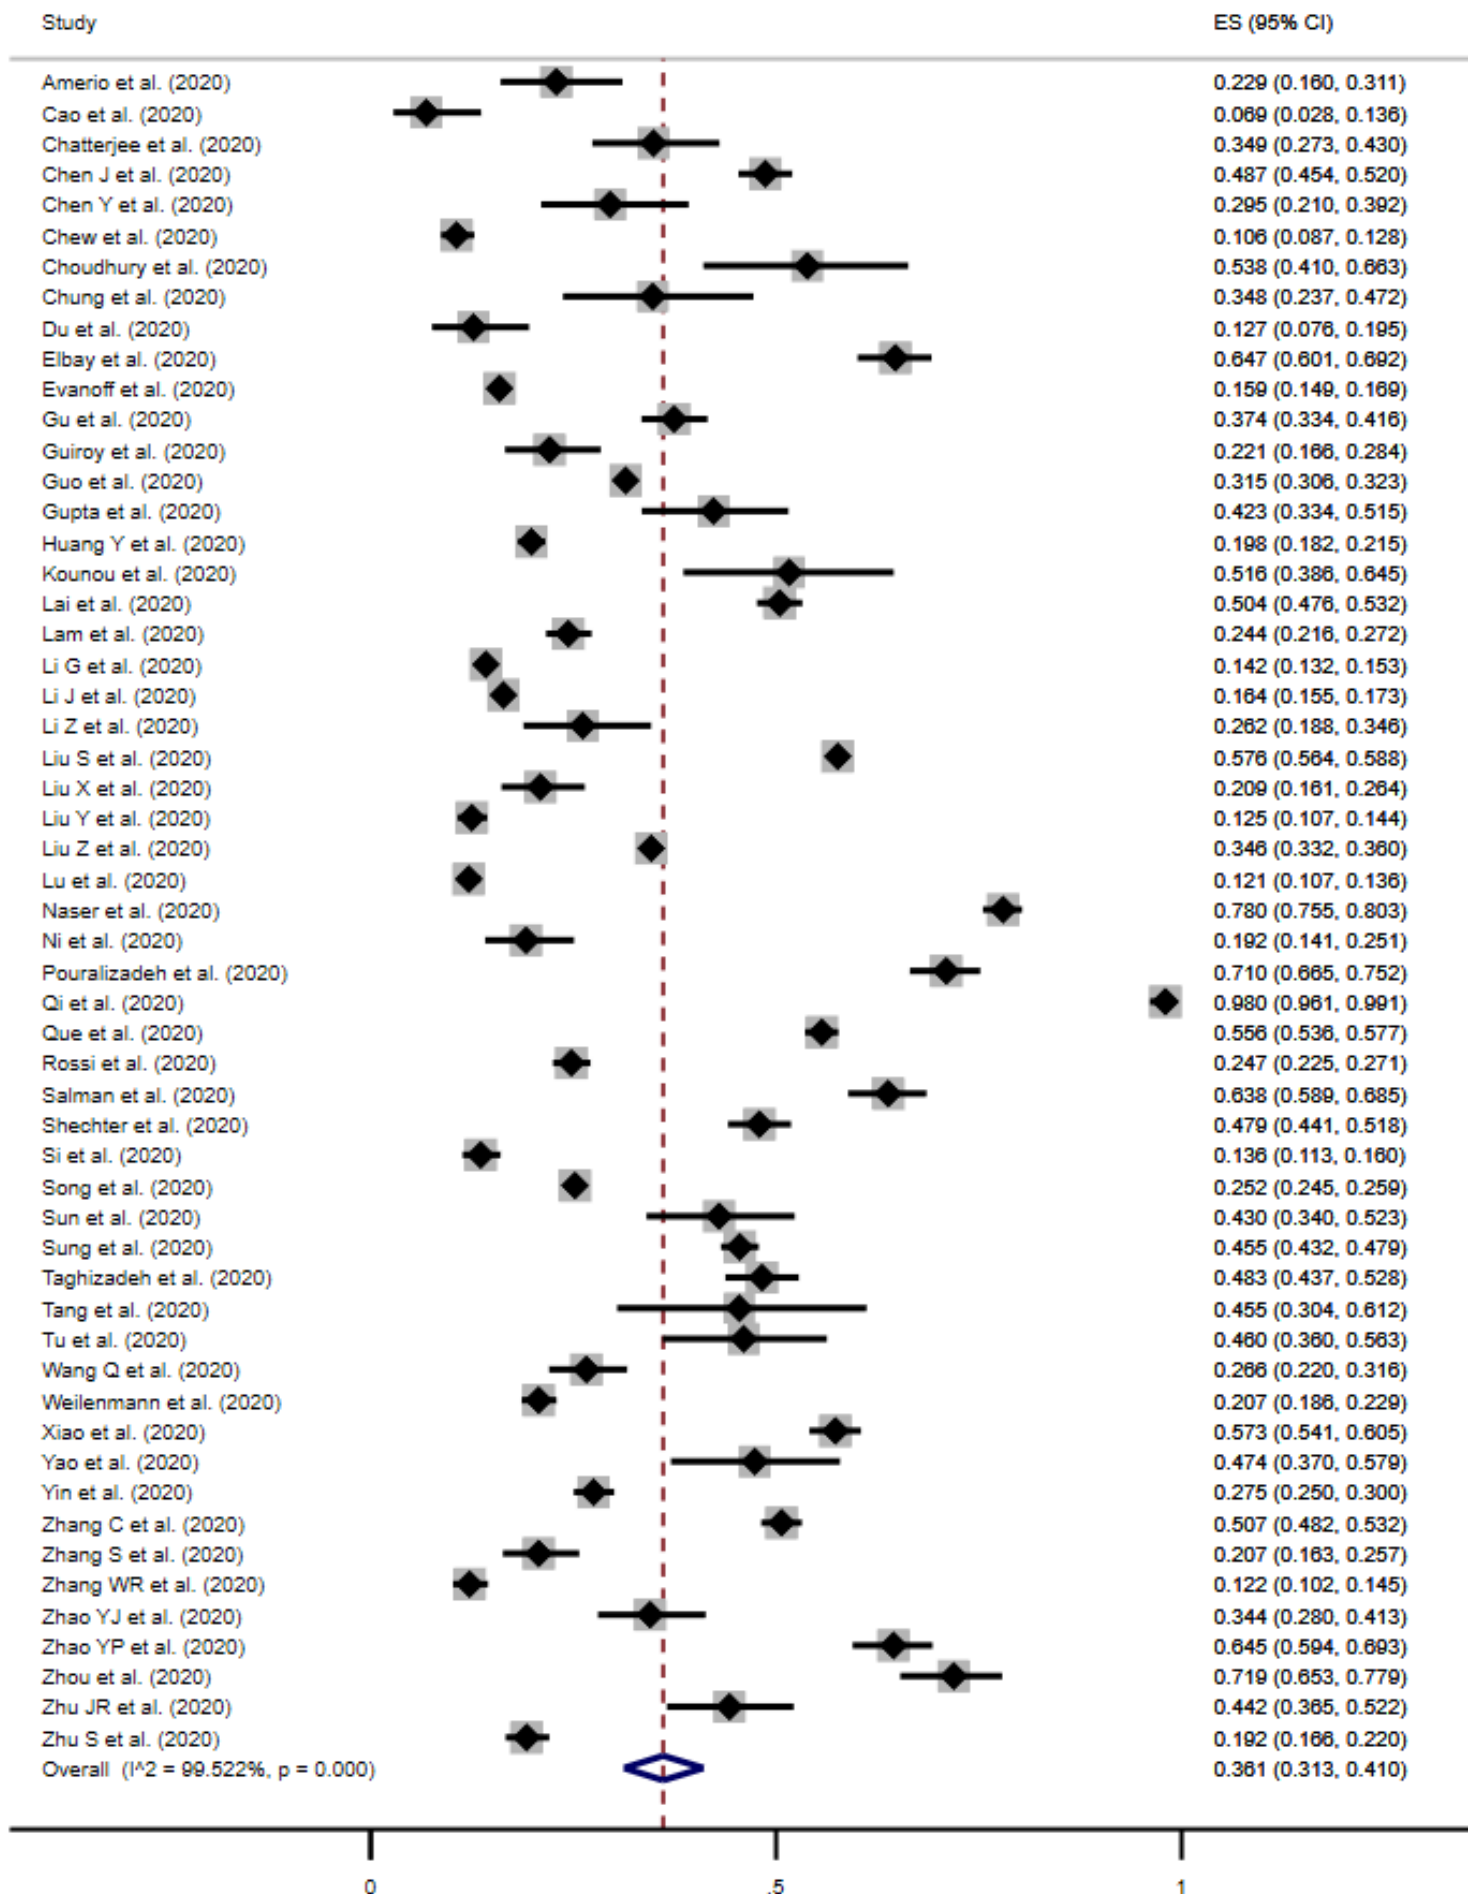

Supplement: pone.0246454.s005.pdf [file pone.0246454.s005.pdf]
